# Supplementary material for: A novel non-Janus MoSF monolayer
Source: Royal Society of Chemistry journal article supplement (doi:10.1039/d5cp01853f), 2025-01-01
Supplement: d5cp01853f1.pdf [file d5cp01853f1.pdf]

## Supporting Information

### Novel non-Janus MoSF Monolayer

Lin Zhang<sup>1, †</sup>, Zhibin Gao<sup>2, †</sup>, Longyuzhi Xu<sup>1</sup>, Li Yang<sup>2</sup>, Zhijing Huang<sup>2, \*</sup>, Yuanbin Zhang<sup>3, \*</sup>,  
Shuming Zeng<sup>1, \*</sup>, Zonglin Gu<sup>1, \*</sup>

<sup>1</sup>College of Physical Science and Technology, Yangzhou University, Jiangsu, 225009, China

<sup>2</sup>College of Physical Science and Technology, Guangxi Normal University, Guilin, Guangxi  
541004, China

<sup>3</sup>Key Laboratory of the Ministry of Education for Advanced Catalysis Materials, College of  
Chemistry and Life Sciences, Zhejiang Normal University, Jinhua 321004, China.

<sup>†</sup>These authors contribute equally to this work

\*Corresponding authors: guzonglin@yzu.edu.cn (Zonglin Gu), zengsm@yzu.edu.cn (Shuming  
Zeng), ybzhang@zjnu.edu.cn (Yuanbin Zhang), huangzhijing@mailbox.gxnu.edu.cn (Zhijing  
Huang).

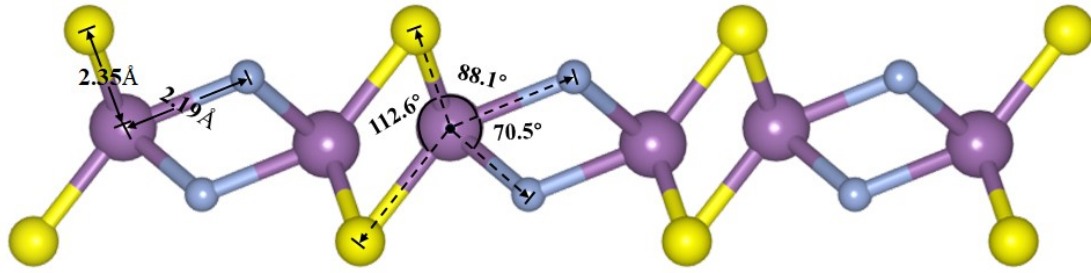

**Figure S1.** Schematic illustration of the distances and bond angles between Mo, S, and F atoms. The unit cell parameters are  $a = 3.28 \text{ \AA}$ ,  $b = 5.34 \text{ \AA}$ ,  $c = 27.26 \text{ \AA}$ .

**Table S1.** Elastic constants of Hybrid 1T'-MoSF monolayer under biaxial strain, in the unit of GPa.

| Strain | $C_{11}$ | $C_{12}$ | $C_{22}$ | $C_{66}$ | Stability |
|--------|----------|----------|----------|----------|-----------|
| 1%     | 31.7     | 11.9     | 38.9     | -2.8     | NO        |
| 2%     | 29.7     | 11.6     | 37.4     | -0.9     | NO        |
| 3%     | 26.4     | 10.6     | 35.8     | -2.1     | NO        |
| 4%     | 24.1     | 10.3     | 34.2     | -2.7     | NO        |
| 5%     | 21.4     | 9.9      | 31.9     | -3.2     | NO        |
| -1%    | 37.4     | 12.9     | 41.8     | -1.5     | NO        |
| -2%    | 47.3     | 7.3      | 47.9     | 0.5      | NO        |
| -3%    | 18.3     | 24.4     | 40.4     | -0.1     | NO        |
| -4%    | 18.7     | 35.4     | 32.5     | -0.3     | NO        |
| -5%    | 12.1     | 41.8     | 30.4     | -0.2     | NO        |

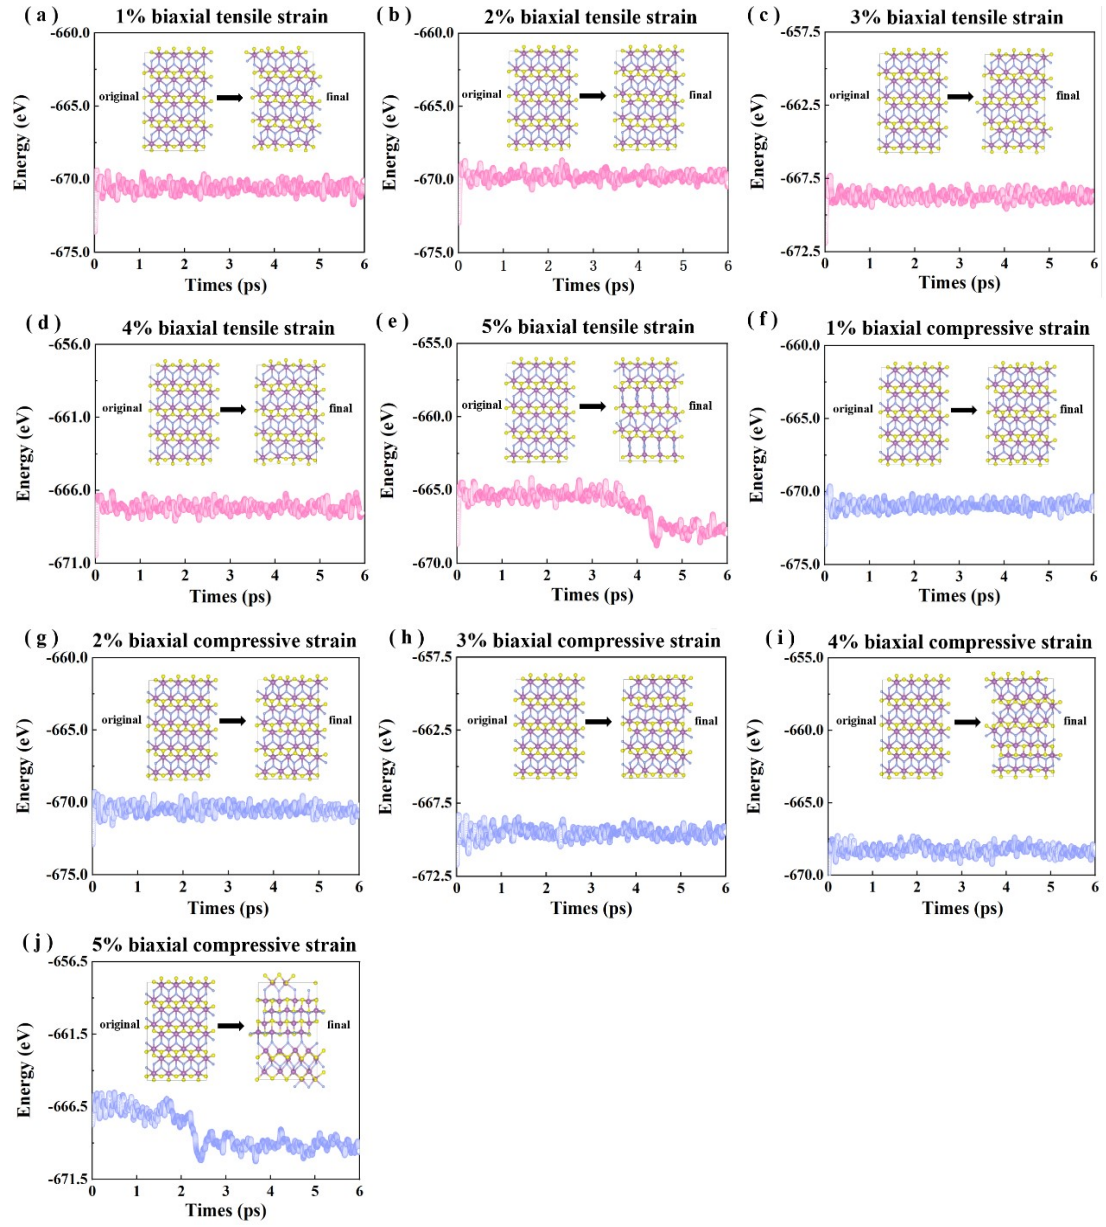

**Figure S2.** The AIMD simulations at 300K for Hybrid 1T'-MoSF monolayer under biaxial strain.

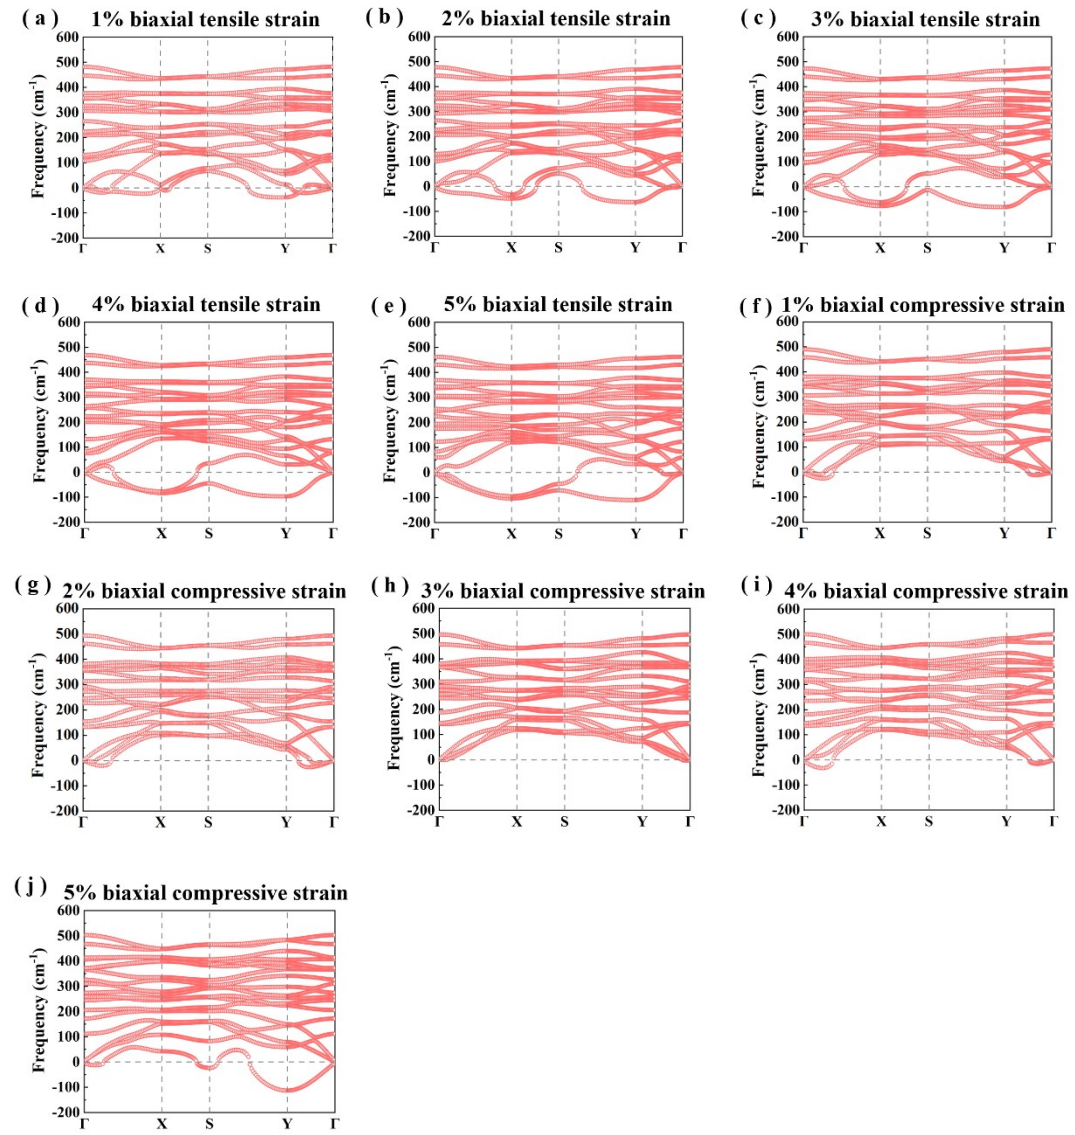

**Figure S3.** The phonon dispersion of Hybrid 1T'-MoSF monolayer under biaxial strain.

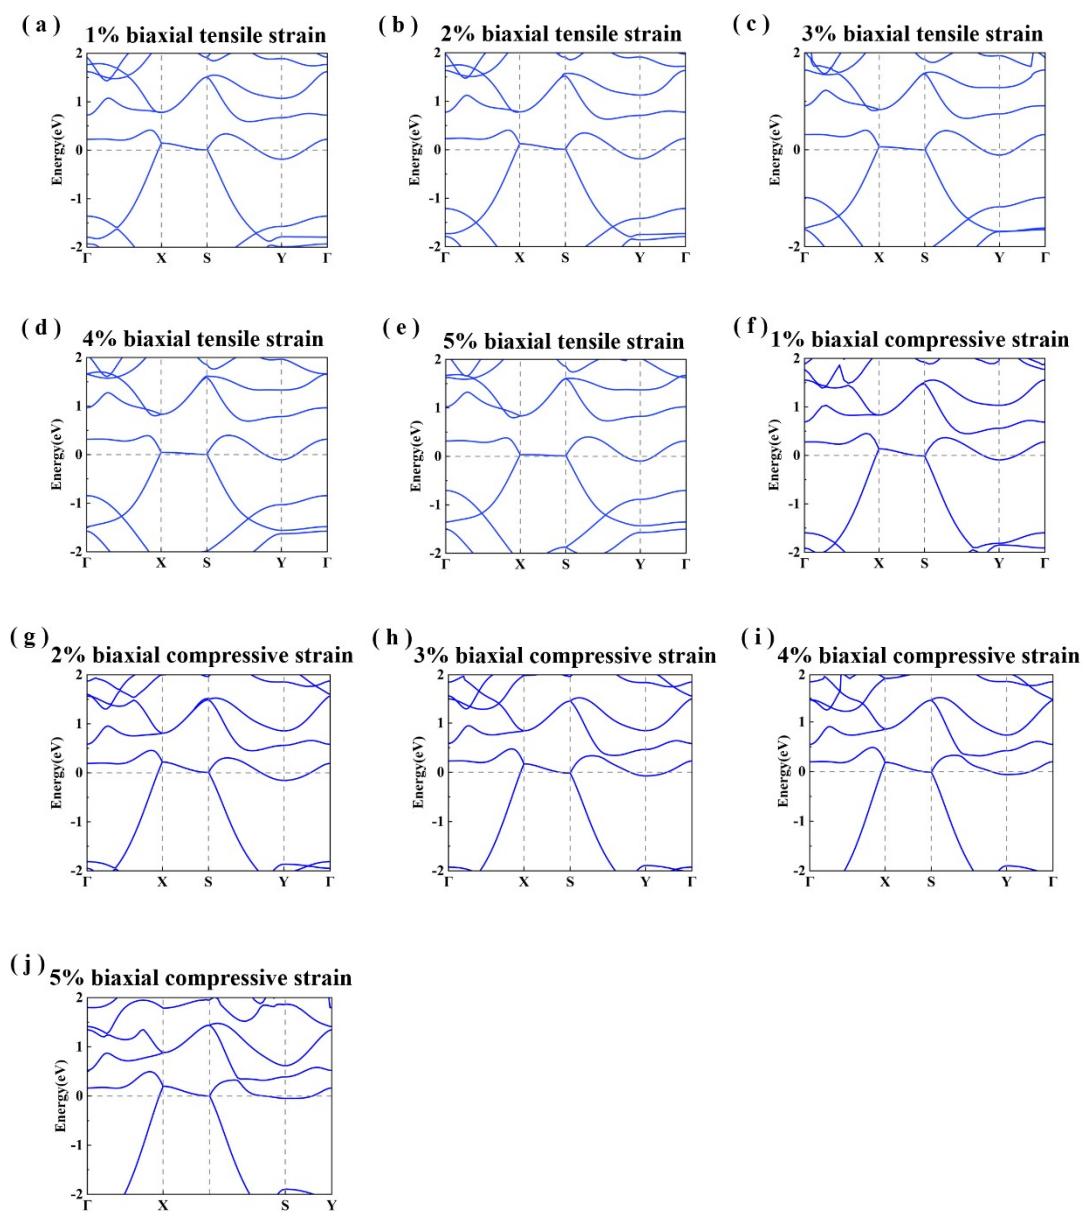

**Figure S4.** Band structure of Hybrid 1T'-MoSF monolayer under biaxial strain.

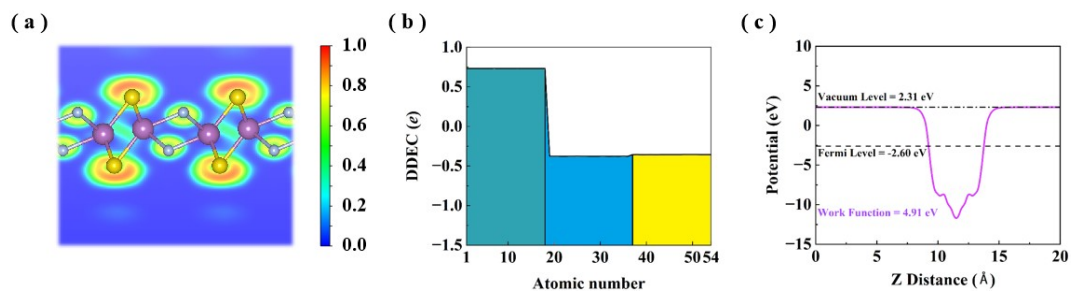

**Figure S5.** (a) Electron localization function (ELF) of Hybrid 1T'-MoSF, (b) The DDEC charge of Janus monolayer MoSF, (c) Work function.

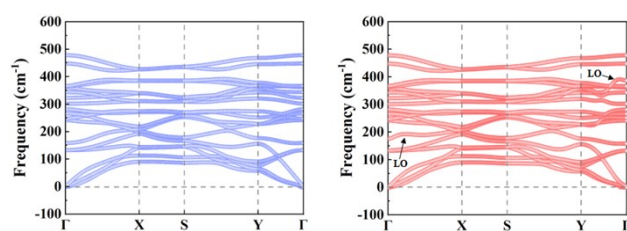

**Figure S6.** The phonon dispersion of Hybrid 1T'-MoSF monolayer without LO-TO splitting (blue) and with LO-TO splitting (red).

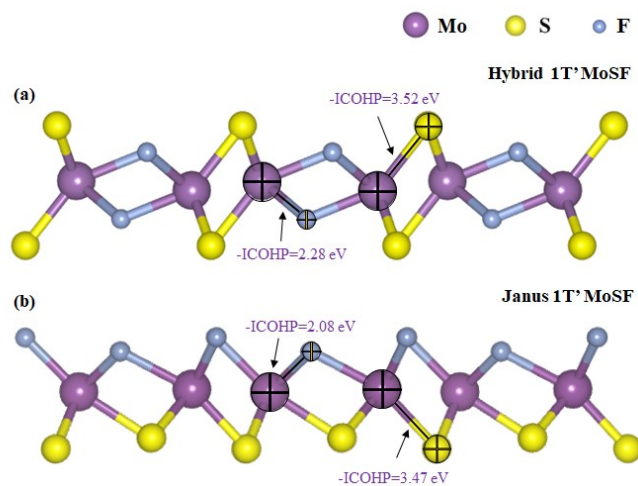

**Figure S7.** The -ICOHP value of Mo-S and Mo-F bonds for (a) Hybrid 1T'-MoSF and (b) Janus 1T'-MoSF.



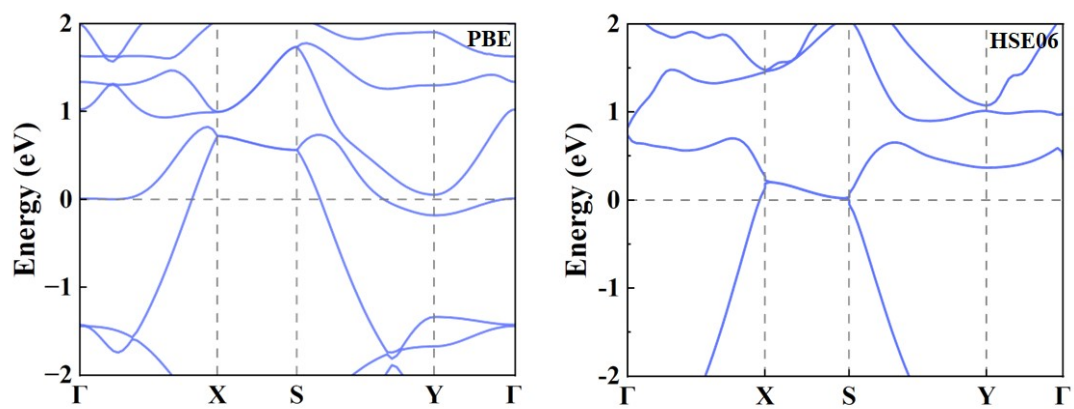

**Figure S8.** The band structure using PBE and HSE06 exchange-correlation functional.
